# Supplementary material
Source: publisher figshare collection journal article supplement (https://acs.figshare.com/ndownloader/files/4203838)

# Identification of 3,*N*<sup>4</sup>-etheno-5-methyl-2'-deoxycytidine in human DNA: a new modified nucleoside which may perturb genome methylation

Jagadeesan Nair<sup>1</sup>, Roger W. L. Godschalk<sup>2\*</sup>, Urmila Nair<sup>1</sup>, Robert W. Owen<sup>1</sup>, William E. Hull<sup>1</sup> & Helmut Bartsch<sup>1</sup>

<sup>1</sup>German Cancer Research Center (DKFZ), Im Neuenheimer Feld 280, D-69120 Heidelberg, Germany.

<sup>2</sup>School for Nutrition, Toxicology and Metabolism (NUTRIM), Dept. of Toxicology, Maastricht University, Universiteitssingel 50, PO box 616, Maastricht, The Netherlands.

\*email: [r.godschalk@maastrichtuniversity.nl](mailto:r.godschalk@maastrichtuniversity.nl)

## Supplementary Methods

### Synthesis Scheme 1.

#### 5'-*O*-(4,4'-dimethoxytrityl)-thymidine-3'-bis(2-cyanoethyl)phosphate (2).

A solution of the commercially available thymidine phosphoramidite (**1**) (3'-*O*-[(diisopropylamino)(2-cyanoethoxy)phosphino]-5'-*O*-(4,4'-dimethoxytrityl)-thymidine, 500 mg, 0.67 mmol) in 10 mL acetonitrile was incubated at ambient temperature with 0.5 mL 3-hydroxypropanenitrile and 2.36 mL of a 1 mM solution of tetrazole in acetonitrile. After 90 min 10 mL of a solution of 3% cumene hydroperoxide in acetonitrile was added to oxidize the phosphite moiety to a phosphate triester. After 2 h the reaction was stopped by addition of 3 mL ethanol. The resulting solution was diluted with 50 mL chloroform and washed with a concentrated aqueous solution of NaHCO<sub>3</sub> (2 × 30 mL) and water (2 × 30 mL). The organic layer was separated, dried with Na<sub>2</sub>SO<sub>4</sub> and filtered; the solvent was removed *in vacuo*. The product was purified by flash chromatography (silica gel, chloroform/methanol 95/5 v/v) to yield 5'-*O*-(4,4'-dimethoxytrityl)-thymidine-3'-bis(2-cyanoethyl)phosphate (**2**) (187 mg, 38%). For C<sub>37</sub>H<sub>39</sub>N<sub>4</sub>O<sub>10</sub>P, exact mass *M* = 730.2404; ESI-MS: [M+Na]<sup>+</sup> *m/z* calcd. 753.2296, found 753.0 (100%).

#### *O*<sup>4</sup>-Ethyl-5'-*O*-(4,4'-dimethoxytrityl)-thymidine-3'-bis(2-cyanoethyl)phosphate (3).

A freshly prepared solution of diazoethane (ca. 8 mmol) in diethylether (10 mL) was poured into a solution of **2** (185 mg, 0.25 mmol) in 5 mL methanol (**Caution: diazoethane is a hazardous alkylating compound and should be handled carefully**). After 30 min the solvents were removed *in vacuo*, and the residue was purified by flash chromatography (chloroform/ethanol: 98/2 v/v) to yield the *O*<sup>4</sup>-ethyl

adduct **3** (26 mg, 13%). For  $C_{39}H_{43}N_4O_{10}P$ , exact mass  $M = 758.2716$ ; ESI-MS ( $m/z$ ):  $[M+Na]^+$  calcd. 781.2609, found 781.2 (40%);  $[2M+Na]^+$  calcd. 1539.5326, found 1539.6 (100%).

### 5-methyl-2'-deoxycytidine-3'-phosphate (**4**).

For the 5' deprotection step, compound **3** (25 mg, 33  $\mu$ mol) was dissolved in 2 mL dry nitromethane, and 2 mL of a saturated solution of  $ZnBr_2$  in nitromethane was added. The reaction mixture turned bright orange. The reaction was then quenched with 1 M ammonium acetate in  $H_2O$  (40 mL) followed by extraction with chloroform (80 mL). The organic solvent was dried over  $Na_2SO_4$ , filtered and removed *in vacuo*. The residue was incubated with 10 mL ammonia for 16 h to deprotect the 3' phosphate and to replace the  $O^4$ -ethyl group with an  $NH_2$  group. Ammonia was roughly removed *in vacuo*, and the solution was lyophilized. Reversed-phase HPLC (Instrumentation: Hewlett Packard, column: prep-C18 reversed phase, solvent: gradient 0 to 50% acetonitrile in water over 30 min; flow rate: 1 mL/min) yielded pure 5-methyl-2'-deoxycytidine-3'-phosphate (5mdCyd-3'-P, **4**). For  $C_{10}H_{16}N_3O_7P$ , exact mass  $M = 321.0726$ ; LC-ESI-MS ( $m/z$ ):  $[M-H]^-$  calcd. 320.0653, found 320.0;  $[2M-H]^-$  calcd. 641.1379, found 641.0;  $[M-(C_5H_7N_3O)-H]^-$  calcd. 195.0064, found 195.0 (neutral loss of 5mCyt).

### 3, $N^4$ -etheno-5-methyl-2'-deoxycytidine-3'-phosphate (**5**).

Compound **4** was incubated overnight in 1 M chloroacetaldehyde (CAA) in water (1 mL) and subsequently subjected to reversed-phase HPLC (conditions as above for **4**), yielding pure 3, $N^4$ -etheno-5-methyl-2'-deoxycytidine-3'-phosphate ( $\epsilon$ 5mdCyd-3'-P, **5**) (100%). This new synthetic compound was characterized by mass spectrometry and UV spectrophotometry (Fig. 1) as well as  $^1H$ -NMR at 500 MHz (Table 1) as shown in Suppl. Fig. 1 below).

**Suppl. Fig. 1.** 500 MHz  $^1H$ -NMR spectrum of 3, $N^4$ -etheno-5-methyl-2'-deoxycytidine-3'-phosphate ( $\epsilon$ 5mdCyd-3'-P, **5**), 0.5 mg in 0.4 mL  $D_2O$ , 30  $^{\circ}C$ , with Lorentz-Gauss resolution enhancement. Multiplets are labeled as in Table 1; unlabeled signals represent residual solvent impurities, e.g. acetonitrile, methanol, acetone, unknown ethyl-X with triplet at 1.28 ppm (not shown) and quartet at 3.20 ppm. Residual HDO signal was not suppressed and exhibits spinning sidebands.

500 MHz  $^1\text{H}$ -NMR: 3,N4-etheno-5-methyl-2'-deoxycytidine-3'-phosphate (5) in  $\text{D}_2\text{O}$ ,  $30^\circ\text{C}$

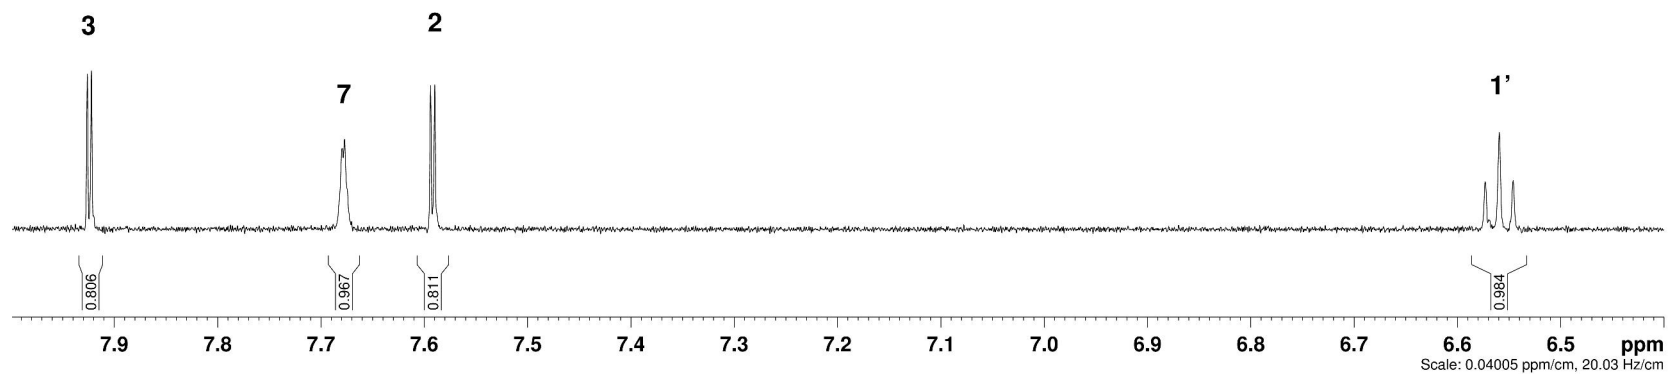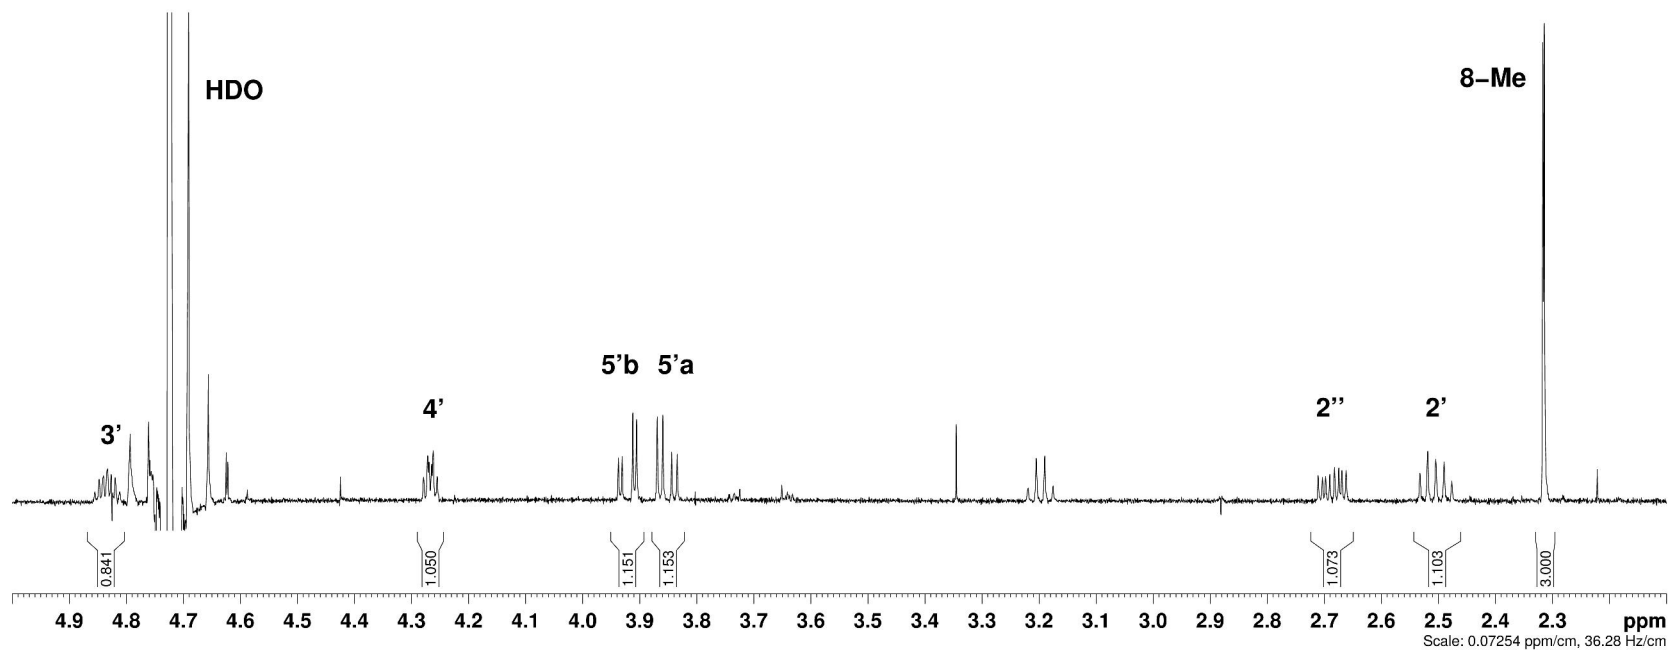

Supplement: Supplementary file 1 [file 4203838]
